# Supplementary material for: The Impact of BRAF Mutation Status on Survival Outcomes and Treatment Patterns among Metastatic Colorectal Cancer Patients in Alberta, Canada
Source: MDPI journal article supplement (doi:10.3390/cancers15245748), 2023-12-08
Supplement: s1 [file s1]

# Supplementary Materials: The Impact of *BRAF* Mutation Status on Survival Outcomes and Treatment Patterns among Metastatic Colorectal Cancer Patients in Alberta, Canada

R. Liam Sutherland, Devon J. Boyne, Darren R. Brenner and Winson Y. Cheung

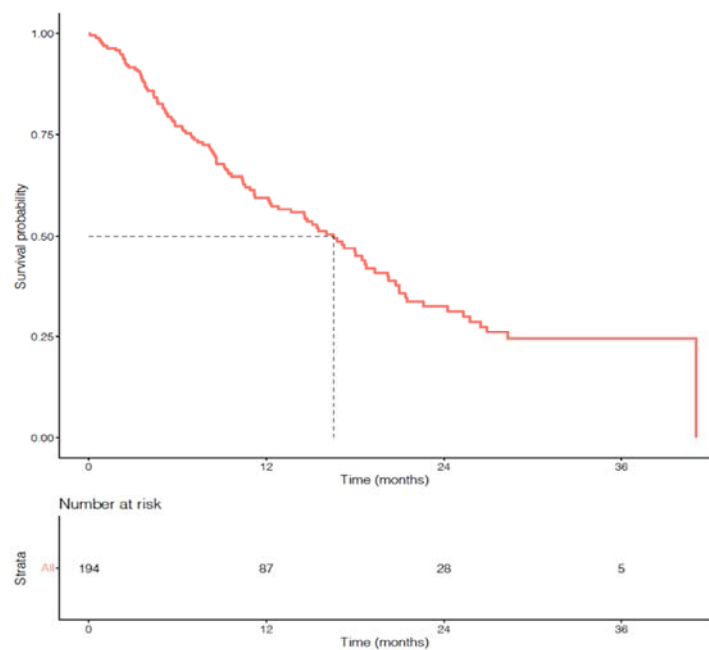

(A)

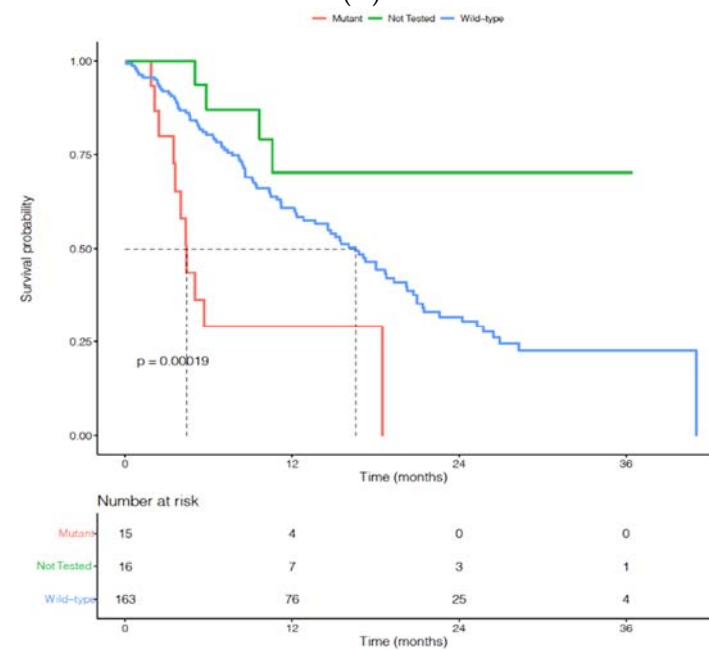

(B)

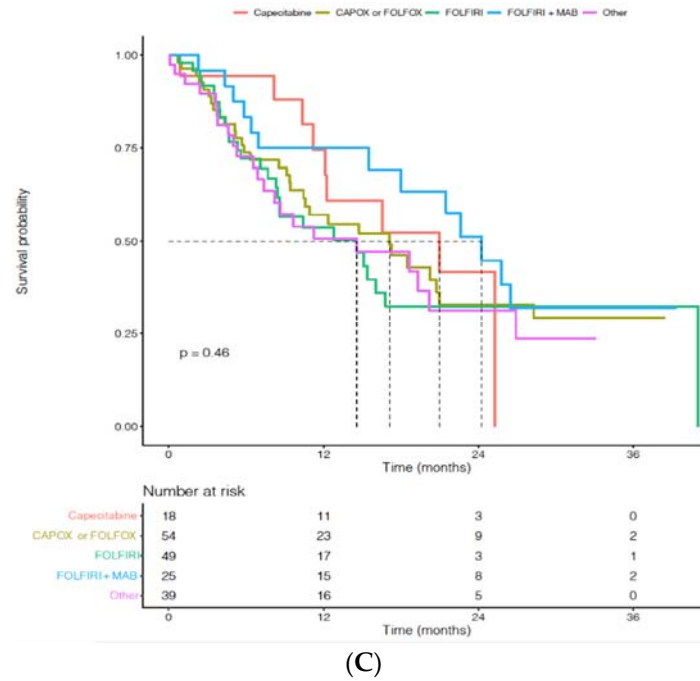

(C)

**Figure S1:** Kaplan-Meier curves depicting survival from time of initiation of second-line therapy to all-cause death. (A) Overall survival. (B) Stratified by *BRAF* status. (C) Stratified by second-line therapy regimen.

**Table S1.** Treatment regimens for third- and fourth-line therapy among metastatic colorectal cancer patients.

| Treatment Group       | Overall   | Mutant | Wild-Type | Not Tested | p     |
|-----------------------|-----------|--------|-----------|------------|-------|
|                       | n = 488   | n = 42 | n = 325   | n = 121    |       |
| Third-line (%)        | 96 (49.5) | <10    | 87 (53.4) | <10        | 0.892 |
| Capecitabine          | <10       | <10    | <10       | <10        |       |
| CAPOX or FOLFOX       | 21 (21.9) | <10    | 20 (23.0) | <10        |       |
| CAPOX or FOLFOX + MAB | <10       | <10    | <10       | <10        |       |
| FOLFIRI               | 12 (12.5) | <10    | 11 (12.6) | <10        |       |
| FOLFIRI + MAB         | 11 (11.5) | <10    | 11 (12.6) | <10        |       |
| Panitumumab           | 24 (25.0) | <10    | 22 (25.3) | <10        | 0.92  |
| Other                 | 24 (25.0) | <10    | 19 (21.8) | <10        |       |
| Fourth-line (%)       | 30 (31.2) | <10    | 28 (32.2) | <10        |       |
| CAPOX or FOLFOX       | <10       | <10    | <10       | <10        |       |
| CAPOX or FOLFOX + MAB | <10       | <10    | <10       | <10        |       |
| FOLFIRI               | <10       | <10    | <10       | <10        |       |
| FOLFIRI + MAB         | <10       | <10    | <10       | <10        |       |
| Other                 | 12 (40.0) | <10    | 10 (35.7) | <10        |       |

<10: data censored due to small cell size.

CAPOX = Capecitabine (Xeloda) and Oxaliplatin (Eloxatin); FOLFIRI = Fluorouracil (5-Fluorouracil, Efudex, Fluoroplex) and Irinotecan and Leucovorin Calcium; FOLFOX = Fluorouracil (5-Fluorouracil, Efudex, Fluoroplex) and Leucovorin Calcium and Oxaliplatin (Eloxatin); MAB = monoclonal antibody.

**Table S2.** Survival analyses from initiation of second-line therapy to all-cause death.

| Strata             | Median survival in months<br>(95% CI) | 1 year survival probability (95% CI) | 2 year survival probability (95% CI) |
|--------------------|---------------------------------------|--------------------------------------|--------------------------------------|
| Overall            | 11.24 (9.36-14.75)                    | 0.48 (0.40-0.56)                     | 0.17 (0.12-0.26)                     |
| <i>BRAF</i> Status |                                       |                                      |                                      |
| Wild type          | 12.16 (9.43-15.38)                    | 0.50 (0.42-0.60)                     | 0.16 (0.11-0.26)                     |
| Mutant             | 4.17 (3.48-18.46)                     | 0.21 (0.08-0.58)                     | 0.07 (0.01-0.47)                     |
| Not-tested         | NA                                    | 0.51 (0.28-0.94)                     | 0.51 (0.28-0.94)                     |
| Treatment Group    |                                       |                                      |                                      |
| Capecitabine       | 16.56 (11.17-NA)                      | 0.68 (0.47-1.00)                     | 0.31 (0.12-0.76)                     |
| CAPOX or FOLFOX    | 11.38 (9.36-18.46)                    | 0.45 (0.33-0.62)                     | 0.20 (0.10-0.38)                     |
| FOLFIRI            | 8.44 (5.58-15.11)                     | 0.38 (0.25-0.59)                     | 0.14 (0.06-0.37)                     |
| FOLFIRI + MAB      | 18.00 (6.96-26.48)                    | 0.62 (0.45-0.87)                     | 0.31 (0.15-0.63)                     |
| Other              | 8.64 (5.29--18.30)                    | 0.40 (0.26-0.62)                     | 0.10 (0.03-0.34)                     |

*BRAF* = v-raf murine sarcoma viral oncogene homolog B1; CI = confidence interval; CAPOX = Capecitabine (Xeloda) and Oxaliplatin (Eloxatin); FOLFIRI = Fluorouracil (5-Fluorouracil, Efudex, Fluoroplex) and Irinotecan and Leucovorin Calcium; FOLFOX = Fluorouracil (5-Fluorouracil, Efudex, Fluoroplex) and Leucovorin Calcium and Oxaliplatin (Eloxatin); MAB = monoclonal antibody; NA = not available.

**Table S3.** Survival analyses from initiation of second-line therapy to cancer-specific death.

| Strata             | Median survival in months (95% CI) | 1 year survival probability (95% CI) | 2 year survival probability (95% CI) |
|--------------------|------------------------------------|--------------------------------------|--------------------------------------|
| Overall            | 12.35 (10.35-16.56)                | 0.52 (0.44-0.61)                     | 0.22 (0.15-0.31)                     |
| <i>BRAF</i> Status |                                    |                                      |                                      |
| Wild type          | 12.81 (10.45-16.79)                | 0.54 (0.46-0.63)                     | 0.20 (0.14-0.31)                     |
| Mutant             | 4.37 (3.58-NA)                     | 0.24 (0.09-0.63)                     | 0.12 (0.02-0.65)                     |
| Not-tested         | NA                                 | 0.61 (0.38-1.00)                     | 0.61 (0.38-1.00)                     |
| Treatment Group    |                                    |                                      |                                      |
| Capecitabine       | 15.56 (11.17-NA)                   | 0.68 (0.47-1.00)                     | 0.31 (0.12-0.76)                     |
| CAPOX or FOLFOX    | 12.35 (9.36-20.73)                 | 0.52 (0.40-0.69)                     | 0.24 (0.13-0.46)                     |
| FOLFIRI            | 8.61 (7.13-15.41)                  | 0.42 (0.28-0.62)                     | 0.16 (0.06-0.40)                     |
| FOLFIRI + MAB      | 21.49 (15.51-NA)                   | 0.70 (0.53-0.93)                     | 0.41 (0.22-0.76)                     |
| Other              | 8.64 (6.54-20.20)                  | 0.42 (0.27-0.64)                     | 0.15 (0.05-0.48)                     |

*BRAF* = v-raf murine sarcoma viral oncogene homolog B1; CI = confidence interval; CAPOX = Capecitabine (Xeloda) and Oxaliplatin (Eloxatin); FOLFIRI = Fluorouracil (5-Fluorouracil, Efudex, Fluoroplex) and Irinotecan and Leucovorin Calcium; FOLFOX = Fluorouracil (5-Fluorouracil, Efudex, Fluoroplex) and Leucovorin Calcium and Oxaliplatin (Eloxatin); MAB = monoclonal antibody; NA = not available.
